# Supplementary material for: Lipopeptide biosurfactant from Bacillus clausii BS02 using sunflower oil soapstock: evaluation of high throughput screening methods, production, purification, characterization and its insecticidal activity
Source: Royal Society of Chemistry journal article supplement (doi:10.1039/c4ra13261k), 2014-11-27
Supplement: c4ra13261k1.pdf [file c4ra13261k1.pdf]

### Supplementary data

Lipopeptide biosurfactant from *Bacillus clausii* BS02 using sunflower oil soapstock:  
Evaluation of high throughput screening methods, production, purification, characterization  
and its insecticidal activity

Chinmay Hazra, Debasree Kundu, Ambalal Chaudhari\*

School of Life Sciences, North Maharashtra University, Jalgaon, Maharashtra, India

\*Corresponding author. School of Life Sciences, North Maharashtra University, P.B. No. 80,  
Jalgaon 425 001, India. Tel.: +91 257 2257425. E-mail: ambchasls@gmail.com;  
ambchasls@yahoo.com (Ambalal Chaudhari)

## **Enrichment, isolation and selection of biosurfactant producers**

Each sample (soil, 5.0 g; water, 5.0 ml; approximately) was added to a 500 ml Erlenmeyer flask containing 100 ml of pre-sterilized Basal salt medium (BSM) [containing (g l<sup>-1</sup>) (NH<sub>4</sub>)<sub>2</sub>SO<sub>4</sub>, 0.9; KH<sub>2</sub>PO<sub>4</sub>, 0.7; K<sub>2</sub>HPO<sub>4</sub>, 1.5; MgCl<sub>2</sub>, 0.5, MgSO<sub>4</sub>, 0.1 and 10 ml of trace element solution containing (g l<sup>-1</sup>): ZnSO<sub>4</sub>·7 H<sub>2</sub>O, 2.32; MnSO<sub>4</sub>·4 H<sub>2</sub>O, 1.78; CuSO<sub>4</sub>·5 H<sub>2</sub>O, 1.0; EDTA, 1.0; KCl, 0.66; H<sub>3</sub>BO<sub>3</sub>, 0.56; CoCl<sub>2</sub>·6 H<sub>2</sub>O, 0.42; Na<sub>2</sub>MoO<sub>4</sub>·2 H<sub>2</sub>O, 0.39; NiCl<sub>2</sub>·6 H<sub>2</sub>O, 0.004; pH 7.0±0.2] broth to which 2% v/v diesel or crude glycerol was added as the sole carbon source. After 3 days of incubation in a rotary shaker (Steelmet Industries, Pune, India) at 120 rpm, 5 ml of culture broth was sampled from each flask and transferred into a second batch of flasks containing fresh medium; these flasks were then incubated under the same conditions to decrease the unwanted microbial load. This process was repeated thrice, and each time 5 ml of culture broth was withdrawn from the 'older' flasks and transferred into new ones. After enrichment, aliquots (100 µl) of serial dilutions (10<sup>-8</sup>) of the culture broth from the last batch of flasks were spread on agar plate with the same composition of the enrichment medium. The resulting plates were incubated at ambient temperature under aerobic conditions for 1-2 days, until colony formation. The morphologically different bacterial colonies which developed on the plates were streaked on nutrient agar plates to obtain pure cultures of the isolates, and were maintained on nutrient agar slants and kept at 4°C in the refrigerator.

## **Contact angle measurements**

A Standard Goniometer (Model no. 200-F4, Rame´-Hart, Netcong, NJ) was used for this purpose. A drop of cell-free culture supernatant was placed on a cleaned surface (1×1×2 cm<sup>3</sup>) at room temperature, and contact angle was determined using the Rame´-Hart Imaging 2001 software package. The volume of the sessile drop was maintained as 5 µl in all cases using a microsyringe. The contact angle was measured within 45-60 s of the addition of the liquid

drop with an accuracy of  $\pm 1^\circ$ . Measurements were repeated at least five times to check the accuracy. Also contact angles were measured with definite time intervals for a single drop and the measurements were recorded as snap shots. A fluid is said to wet a solid surface if the contact angle is  $< 90^\circ$  (for surfactant containing liquids). If the contact angle is  $> 90^\circ$ , the fluid is said to be non-wetting.<sup>1,2</sup>

## **Identification of the selected isolate**

### *Preliminary phenotypic and biochemical characterization*

Phenotypic characterization of the shortlisted isolates was done based on their colony morphology, microscopic observations, and biochemical tests. For this purpose, BSM broth or agar was used as the basal medium. Cell morphology was observed using a light microscope (model: BX51, OLYMPUS, Japan) and field emission scanning electron microscope (FESEM, model: S-4800, Hitachi, Japan) after 24 h growth on BSM agar at 30°C. Morphological properties were studied according to general protocols<sup>1</sup> following growth on BSM agar after 48 h at 30°C. The Gram reaction was determined by the conventional Gram staining method by using the Gram staining kit (HiMedia, Mumbai, India). Spore staining were done using standard protocol.<sup>3</sup> Cell motility was determined with an optical microscope using the hanging drop method.<sup>4</sup>

Physiological tests such as growth at different temperatures, pH and tolerance to NaCl were examined on BSM medium at 30°C, unless otherwise indicated. Biochemical characterization which included oxidase and catalase reaction, nitrate reduction, IMViC tests, urease tests, phenylalanine deaminase activity, acid or gas production from carbohydrates etc. were performed using KB002 HiAssorted™ Biochemical test kit according to the manufacturer's instructions (HiMedia, Mumbai, India) for the isolate BS01. All of the tests

were performed in duplicate. The isolates were identified according to Bergey's Manual of Determinative Bacteriology.<sup>5</sup>

#### *Whole-cell fatty acid Methyl Ester (FAME) profiling*

This analysis was performed at Royal Life Sciences Pvt. Ltd., Hyderabad (affiliated to MIDI Sherlock, USA). Pure culture of the isolates were cultivated on Trypticase Soy Broth Agar (TSBA) plates at 28°C for 24 h. Cellular fatty acid methyl esters of freshly grown culture were obtained by a four step method (saponification, methylation, extraction and washing) as per MIDI manual (Microbial Identification, Inc.). The samples were injected in to a Gas Chromatograph (model: 6850 Series II, Agilent, USA) equipped with a flame ionization detector and 30 m Rtx®-5 (fused silica) capillary column (Restek, Bellefonte, PA). Ultra-high purity hydrogen was used as a carrier gas and column head pressure was 60 kPa. Injector and detector temperatures were 300°C and 240°C, respectively. Temperature of oven was programmed to increase from 170°C to 270°C at a rate of 5°C min<sup>-1</sup>. Fatty acid profiles were identified with Sherlock software version 6.0B (RTSBA6 library version 6.00, MIDI). The peaks were automatically named and quantitated by the system. A similarity (SIM) index cutoff of 0.6 was used to determine confident species match, unless otherwise specified. Qualitative and quantitative differences in the fatty acid profiles were used to compute the distance for each strain relative to the strains in the library.

#### *16S rDNA sequencing and phylogenetic analysis*

The taxonomic characterization on the basis of nucleotide sequence of 16S rDNA was confirmed through an external agency (Royal Life Science Pvt. Ltd., Hyderabad, India). DNA extraction of a single colony was performed as per Ausubel *et al.*<sup>6</sup> PCR amplification of the 16S rRNA gene was performed using universal primer 16sF (5'-AGA GTT TGA TCC TGG CTC AG-3') and 16sR (5'-ACG GCT ACC TTG TTA CGA CTT-3') on a GeneAMP

PCR System 9700 thermal cycler in 25  $\mu$ l reaction mixture. The PCR conditions comprised of (i) initial denaturation step (95°C, 10 min), (ii) 25 cycles of (a) denaturation (95°C, 1 min), (b) annealing (55°C, 1 min) (c) extension (72°C, 1.30 min) and (iii) final extension (72°C, 10 min). PCR products were purified using Qiagen PCR Product Purification kit before subjecting to fluorescence-based ABI BigDye™ terminator chemistry as per manufacturer's instructions. DNA cycle sequencing was performed in automated ABI 3730XL DNA Analyzer (Applied Biosystems, USA) and basecalled using Sequence Scanner v1.0. Sequence similarities were inferred from NCBI GenBank database using BLAST<sup>7</sup> for phylogenetic analysis using sequences of the related taxa. Neighbor joining tree<sup>8</sup> was constructed based on distance matrices calculated according to the Kimura two-parameter model<sup>9</sup> using MEGA v5.04.<sup>10</sup>

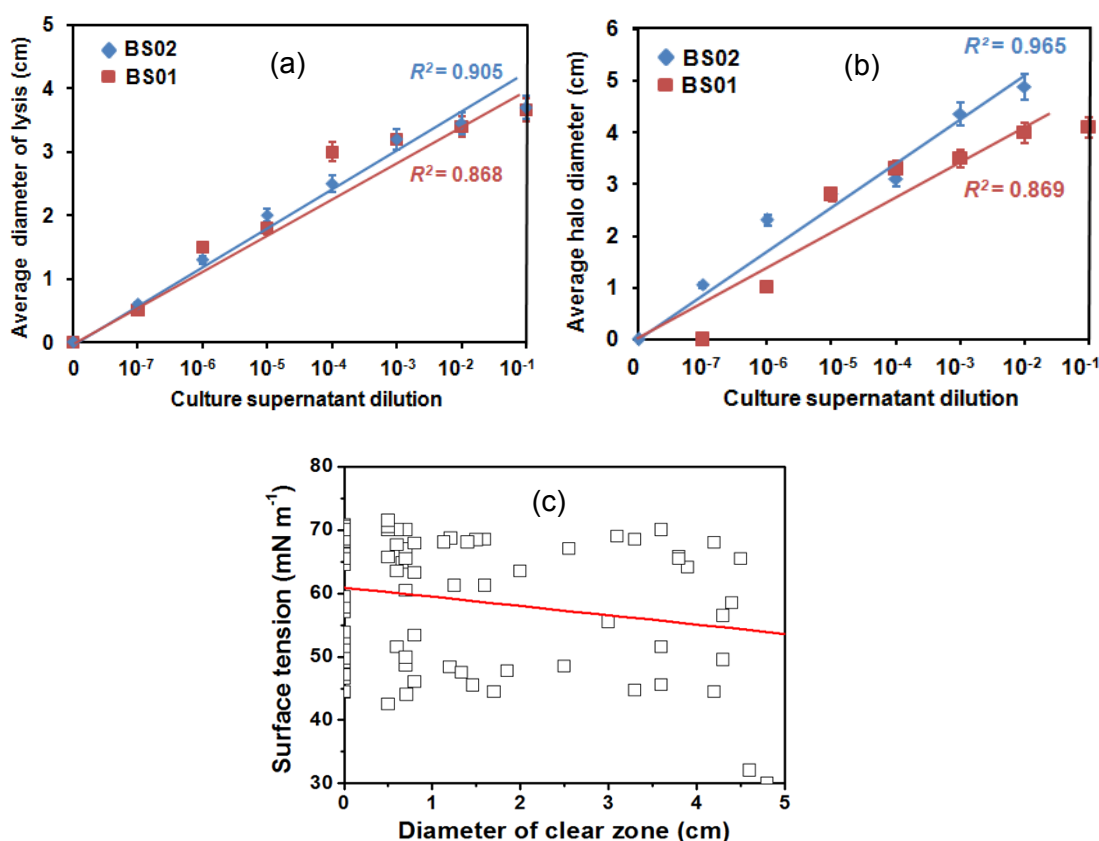

**Fig. S1.** The relationship between (a) the diameter of blood agar lysis (in cm) and the concentration of biosurfactant in cell-free culture broth; (b) the diameter of the clear zone obtained by the oil spreading technique (in cm) and the concentration of biosurfactant in cell-free culture broth; and (c) the diameter of the clear zone obtained by the oil spreading

technique (in cm) and surface tension of the culture (in  $\text{mN m}^{-1}$ ), where each point represents a different isolate. The solid line is the least square fit. Error bars indicate the standard deviation of three independent measurements. The solid line is the least square fit. Where the error bars are not visible, the standard deviation was within the area occupied by the symbol.

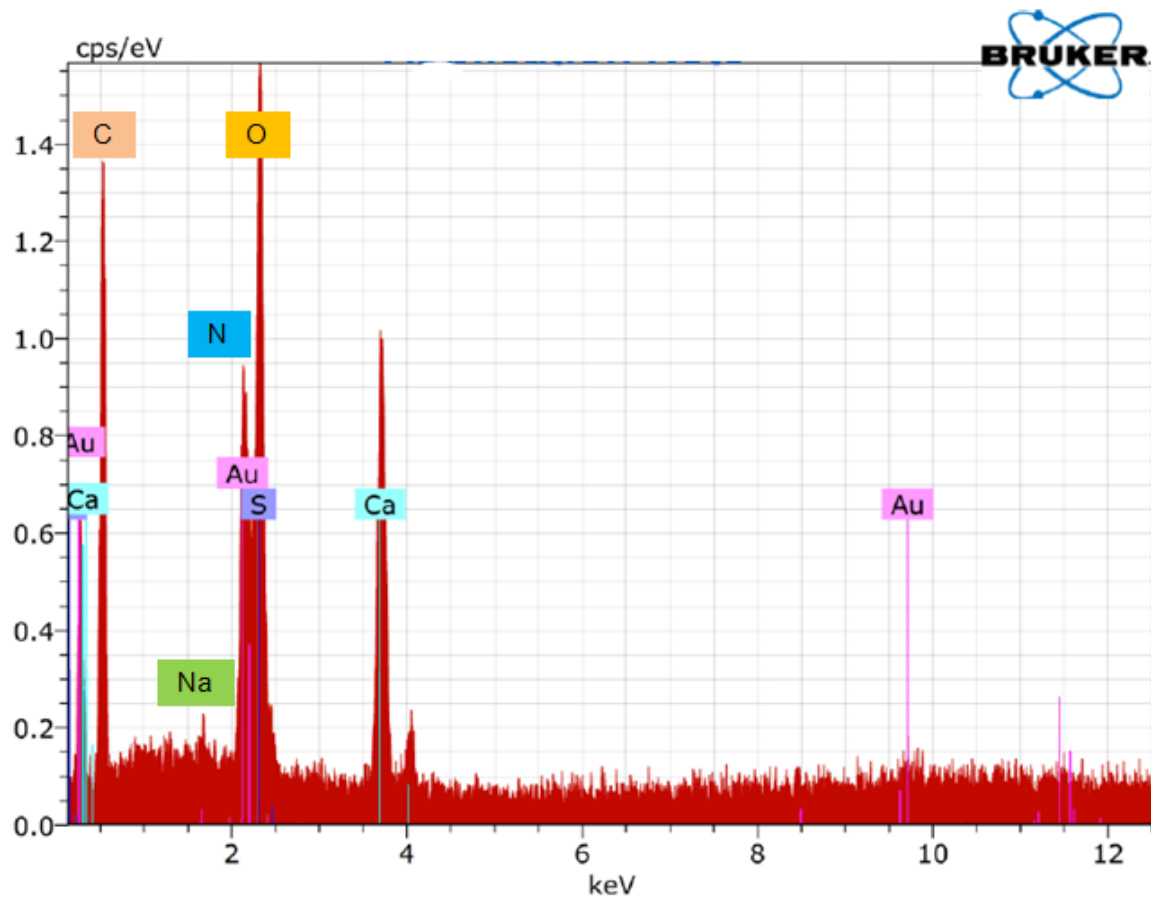

**Fig. S2.** EDX spectrum of the recovered crude biosurfactant obtained from *B. clausii* BS02

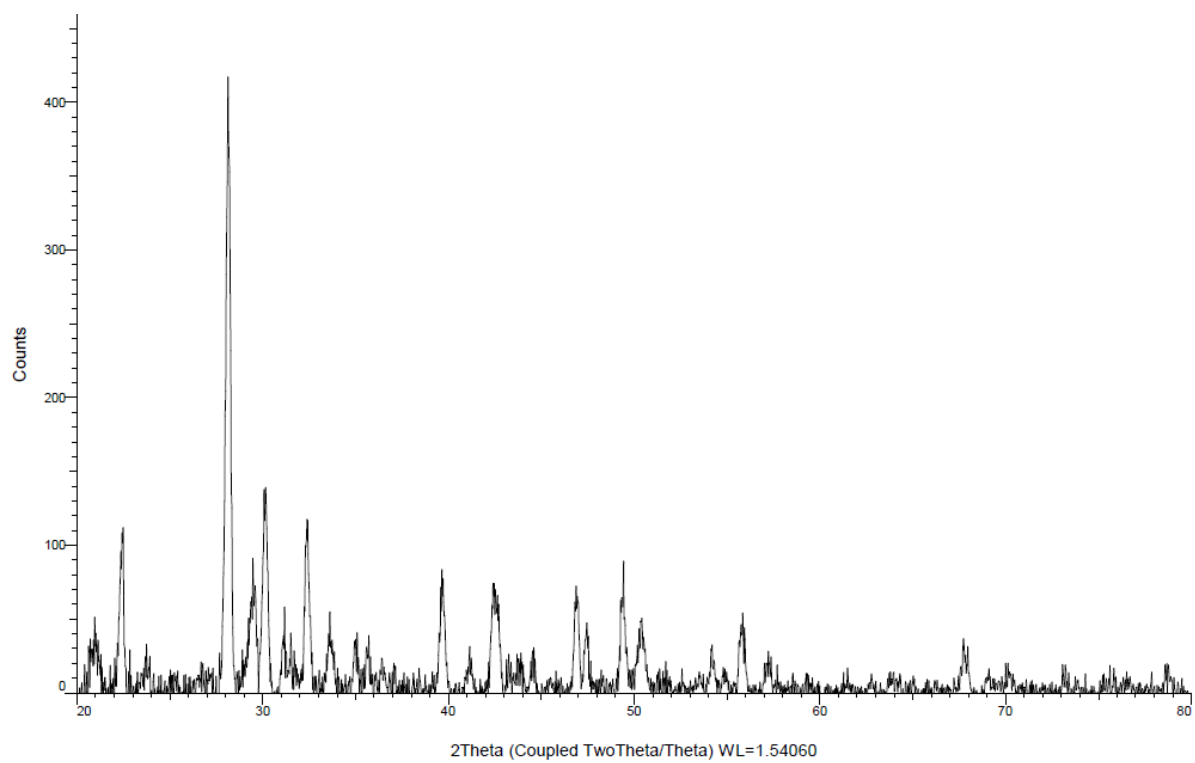

**Fig. S3.** Powder X-ray diffraction of the recovered crude biosurfactant obtained from *B. clausii* BS02



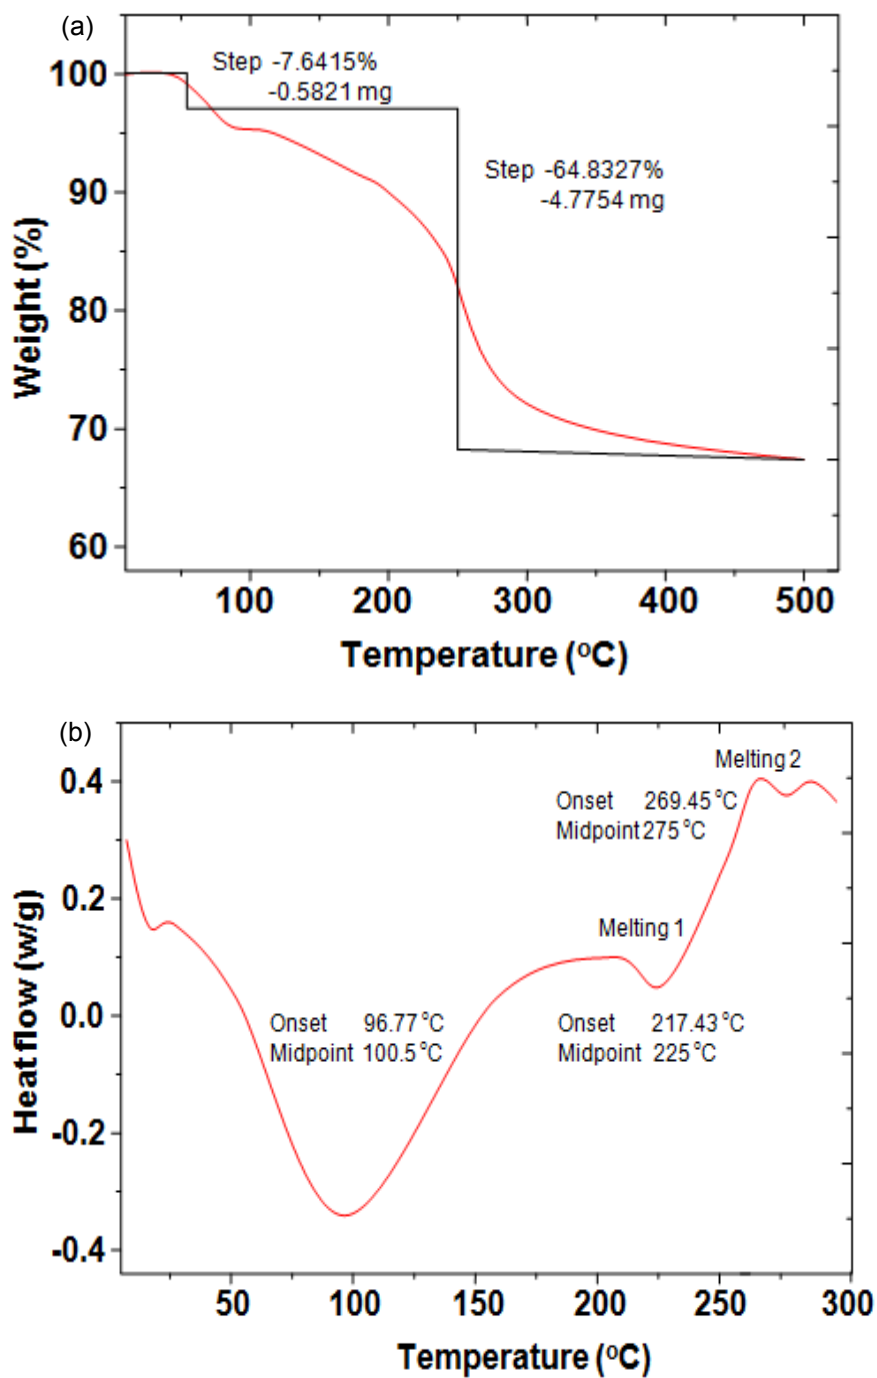

**Fig. S4.** (a) TG and (b) DSC thermogram of crude biosurfactant obtained from *B. clausii* BS02 at heating rate of 10°C.

**Table S1.** Details of the sampling sites and their relative bacterial composition

| Sampling site                                            | Site description                                                                                         | No. of total isolates |               |
|----------------------------------------------------------|----------------------------------------------------------------------------------------------------------|-----------------------|---------------|
|                                                          |                                                                                                          | Gram-negative         | Gram-positive |
| <i>Soil</i>                                              |                                                                                                          |                       |               |
| <b>Petrol pump station</b>                               | Soil mixed with petrol and diesel                                                                        | <b>18</b>             | <b>04</b>     |
| <b>Garage installations</b>                              | Receives vehicle run-off                                                                                 | <b>05</b>             | <b>01</b>     |
| <b>Hydrocarbon contaminated area</b>                     | Receives run-off from environment                                                                        | <b>05</b>             | <b>02</b>     |
| <b>Pesticide contaminated region</b>                     | Prevalent history of pesticide contamination and collects sippage from nearby solvent producing industry | <b>04</b>             | <b>01</b>     |
| <b>Artificially created kerosene contaminated locale</b> | Residential garden soil, maintained with daily dose of kerosene for a month                              | <b>04</b>             | <b>07</b>     |
| <i>Sewage effluent</i>                                   |                                                                                                          |                       |               |
| <b>Coconut wastewater</b>                                | Receives effluent from public street vendor                                                              | <b>05</b>             | <b>05</b>     |
| <b>Dairy wastewater</b>                                  | Water canal by milk factory and dairy farm                                                               | <b>03</b>             | <b>07</b>     |
| <i>Oily sludge</i>                                       |                                                                                                          |                       |               |
| <b>Temple</b>                                            | Receives edible oils                                                                                     | <b>02</b>             | <b>0</b>      |
| <b>Mustard oil production facility</b>                   | Waste oily sludge from production unit                                                                   | <b>02</b>             | <b>01</b>     |

**Table S2.** Assessment of various screening methods for detecting biosurfactant activity among tested bacterial isolates (contd. on next page)

| Isolate              | Assay methods |   |    |       |       |      |   |   |   |    |    |    |     |    |       |       |     |
|----------------------|---------------|---|----|-------|-------|------|---|---|---|----|----|----|-----|----|-------|-------|-----|
|                      | 1             | 2 | 3  | 4     | 5     | 6    | 7 | 8 | 9 | 10 | 11 | 12 | 13  | 14 | 15    | 16    |     |
|                      | K             |   |    | D     |       |      |   |   |   |    |    |    |     |    |       |       |     |
| <b>Gram positive</b> |               |   |    |       |       |      |   |   |   |    |    |    |     |    |       |       |     |
| BS02                 | +             | + | ++ | 88.91 | 81.57 | ++++ | + | + | + | ++ | +  | +  | +++ | -  | 52.07 | 75°   | +++ |
| BS03                 | +             | + | +  | 18.92 | 17.65 | +    | - | - | - | +  | -  | -  | -   | -  | 48.4  | 88°   | +   |
| BS04                 | +             | + | ++ | 22.5  | 25    | +++  | - | + | + | +  | -  | +  | ++  | -  | 44.5  | 83°   | -   |
| BS06                 | +             | + | +  | 2.7   | 57.14 | +    | - | + | + | +  | -  | +  | ++  | -  | 65.7  | 99°   | ++  |
| BS16                 | +             | + | +  | 10.81 | 38.46 | ++   | - | + | + | ++ | -  | +  | +++ | -  | 68.7  | 105°  | +   |
| BS19                 | +             | + | +  | 16.66 | 64.71 | -    | - | + | + | -  | -  | +  | +   | -  | 66.05 | 101°  | +   |
| BS20                 | -             | - | ++ | 41.66 | 46.67 | -    | - | + | + | -  | -  | +  | +   | -  | 46.5  | 82°   | ++  |
| BS21                 | -             | - | +  | 31.57 | 62.5  | -    | - | + | + | -  | -  | +  | +   | +  | 44.3  | 81°   | -   |
| BS22                 | -             | - | +  | 68.42 | 50    | -    | - | + | + | -  | -  | +  | +++ | -  | 48.08 | 85.5° | +   |
| BS23                 | +             | + | -  | 5.26  | 12.5  | +++  | + | + | + | +  | +  | +  | +   | -  | 47.5  | 83°   | -   |
| BS24                 | +             | + | +  | 74.35 | 80    | +    | - | - | - | ++ | -  | -  | -   | -  | 44.03 | 82°   | -   |
| BS25                 | +             | + | +  | 67.56 | 20    | ++   | - | + | + | +  | -  | +  | +++ | -  | 45.5  | 84°   | +   |
| BS26                 | +             | - | -  | 61.72 | 32    | -    | - | + | + | +  | +  | -  | -   | +  | 49.04 | 88°   | -   |
| BS27                 | +             | + | -  | 63.15 | 23.53 | +    | - | + | + | -  | -  | -  | +   | -  | 51.5  | 89°   | +   |
| BS28                 | +             | + | +  | 51.3  | 31.2  | +++  | - | + | + | -  | -  | -  | +++ | -  | 64.08 | 101°  | +   |
| BS29                 | +             | + | ++ | 31.5  | 43.7  | -    | - | + | + | +  | -  | -  | -   | -  | 70.5  | 109°  | -   |
| BS30                 | +             | + | -  | 84.2  | 35.7  | -    | - | - | - | -  | -  | -  | -   | -  | 70.8  | 108°  | -   |
| BS33                 | +             | + | -  | 72.9  | 42.8  | -    | - | - | - | +  | -  | -  | -   | -  | 70.6  | 106°  | -   |
| BS34                 | +             | + | -  | 47.2  | 68.7  | -    | - | + | + | -  | -  | -  | +   | -  | 69.5  | 104°  | -   |
| BS35                 | +             | + | +  | 54    | 68.7  | ++   | - | + | + | +  | -  | -  | -   | -  | 68.07 | 105°  | -   |
| BS36                 | +             | - | +  | 59.4  | 50    | -    | - | + | + | -  | -  | -  | -   | -  | 52.55 | 92°   | +   |
| BS37                 | +             | - | ++ | 81    | 20    | -    | - | + | + | -  | -  | -  | -   | -  | 51.07 | 95.5° | +   |
| BS38                 | -             | - | -  | 2.6   | 20    | -    | - | + | + | -  | -  | -  | +++ | -  | 49.05 | 93.5° | -   |
| BS39                 | +             | + | +  | 70.2  | 76.9  | ++   | + | + | + | +  | +  | +  | +   | -  | 61.27 | 103°  | +   |
| BS40                 | +             | + | -  | 48.3  | 68.7  | +    | - | + | + | -  | -  | -  | +   | +  | 64.84 | 106°  | -   |
| BS45                 | +             | + | +  | 65.5  | 56.2  | +++  | - | + | + | +  | -  | -  | +++ | -  | 65.77 | 107°  | +   |
| BS47                 | +             | - | +  | 44.8  | 64.7  | -    | - | + | + | -  | -  | -  | -   | -  | 69.03 | 108°  | +   |
| BS48                 | +             | - | -  | 60    | 70.5  | -    | - | + | + | -  | -  | -  | -   | -  | 68.5  | 102°  | -   |
| BS49                 | +             | + | +  | 69.3  | 76.9  | -    | - | + | + | -  | -  | -  | -   | -  | 68.08 | 102°  | -   |
| BS51                 | +             | + | -  | 59.3  | 64.2  | +    | - | + | + | -  | -  | -  | +   | -  | 70.04 | 101°  | -   |
| BS52                 | +             | - | -  | 67.8  | 58.8  | -    | - | + | + | +  | -  | -  | -   | -  | 64.45 | 86.7° | -   |
| BS53                 | +             | - | +  | 70    | 52.9  | -    | - | + | + | -  | -  | -  | -   | -  | 68.19 | 104°  | -   |
| BS54                 | +             | + | ++ | 63.3  | 53.8  | +++  | - | + | + | -  | -  | -  | -   | -  | 67.05 | 105°  | -   |
| BS55                 | +             | + | +  | 77.7  | 66.6  | ++++ | - | + | + | -  | -  | -  | +   | -  | 68.03 | 103°  | -   |
| BS56                 | +             | + | +  | 66.6  | 62.5  | +    | - | + | + | -  | -  | -  | +   | -  | 67.08 | 102°  | -   |
| BS57                 | +             | + | +  | 73    | 58.8  | ++++ | - | + | + | +  | -  | -  | +   | -  | 65.5  | 105°  | +   |
| BS58                 | +             | + | +  | 66.6  | 16.6  | ++   | - | + | + | -  | -  | -  | ++  | +  | 63.27 | 102°  | +   |
| BS59                 | +             | + | ++ | 61.2  | 50    | +    | - | + | + | -  | -  | -  | +   | -  | 49.5  | 94°   | +   |
| BS61                 | +             | + | -  | 66.6  | 62.5  | +    | - | + | + | -  | -  | -  | -   | +  | 48.6  | 93°   | -   |
| BS63                 | +             | + | +  | 60    | 73.3  | ++   | - | + | + | +  | -  | -  | -   | +  | 44.5  | 91°   | -   |
| BS64                 | +             | + | -  | 58    | 85.7  | +    | - | + | + | -  | -  | -  | -   | -  | 68.5  | 103°  | -   |

Table S2. contd

| Isolate              | Assay methods |   |    |       |       |      |    |   |   |    |    |    |     |    |       |         |     |
|----------------------|---------------|---|----|-------|-------|------|----|---|---|----|----|----|-----|----|-------|---------|-----|
|                      | 1             | 2 | 3  | 4     | 5     | 6    | 7  | 8 | 9 | 10 | 11 | 12 | 13  | 14 | 15    | 16      |     |
|                      | K             |   |    | D     |       |      |    |   |   |    |    |    |     |    |       |         |     |
| <b>Gram negative</b> |               |   |    |       |       |      |    |   |   |    |    |    |     |    |       |         |     |
| BS01                 | +             | + | ++ | 92.77 | 91.65 | ++++ | ++ | - | - | ++ | +  | +  | +++ | +  | 30.06 | 76°     | +++ |
| BS05                 | +             | + | +  | 5     | 84.62 | ++   | -  | + | + | ++ | +  | +  | +   | -  | 47.8  | 88°     | +   |
| BS07                 | +             | + | +  | 25    | 73.33 | -    | +  | - | - | +  | +  | +  | +   | -  | 44.5  | 83°     | +   |
| BS08                 | +             | + | +  | 27.5  | 70.59 | ++++ | +  | - | + | +  | +  | +  | +++ | +  | 56.5  | 102°    | +   |
| BS09                 | +             | + | -  | 2.56  | 68.75 | +    | +  | + | - | +  | -  | -  | +   | +  | 63.5  | 107°    | +   |
| BS10                 | +             | + | -  | 24.3  | 20    | -    | -  | + | + | +  | -  | -  | -   | -  | 68.8  | 108°    | -   |
| BS11                 | +             | + | +  | 21.4  | 11.76 | +    | -  | + | + | +  | -  | -  | +++ | +  | 53.4  | 89.8°   | -   |
| BS12                 | +             | + | -  | 40.5  | 66.67 | ++++ | +  | + | + | -  | -  | -  | +   | -  | 58.5  | 88.5°   | -   |
| BS13                 | -             | - | ++ | 10.8  | 18.75 | -    | -  | + | + | +  | -  | -  | -   | -  | 57.08 | 94°     | -   |
| BS14                 | +             | + | +  | 10.5  | 8.33  | -    | -  | + | + | ++ | -  | -  | +++ | -  | 49.7  | 96.4°   | -   |
| BS15                 | +             | + | +  | 10.5  | 8.33  | ++   | ++ | + | + | -  | -  | -  | -   | -  | 65.5  | 104°    | -   |
| BS17                 | +             | + | ++ | 44.4  | 38.46 | -    | +  | + | + | +  | -  | -  | -   | -  | 66.16 | 106°    | -   |
| BS18                 | +             | + | -  | 80    | 26.67 | +    | ++ | + | + | ++ | -  | -  | -   | -  | 70.04 | 101°    | -   |
| BS31                 | +             | + | -  | 87.8  | 20    | -    | -  | - | - | -  | -  | -  | -   | -  | 53.83 | 91°     | -   |
| BS32                 | +             | + | -  | 71.4  | 46.15 | ++++ | -  | - | - | -  | -  | -  | -   | -  | 51.5  | 87.2°   | -   |
| BS41                 | +             | + | +  | 66.5  | 83.33 | +    | +  | + | + | +  | -  | -  | -   | -  | 70.05 | 106°    | -   |
| BS42                 | +             | + | -  | 60    | 66.67 | ++   | -  | + | + | +  | -  | -  | -   | -  | 68.44 | 103°    | -   |
| BS43                 | +             | + | +  | 11.1  | 53.3  | +    | -  | + | + | +  | -  | -  | ++  | -  | 67.9  | 102°    | -   |
| BS44                 | +             | + | +  | 72.4  | 45.4  | ++   | -  | + | + | +  | -  | -  | -   | +  | 61.25 | 87.5°   | -   |
| BS46                 | +             | + | +  | 46.6  | 64.2  | -    | -  | + | + | +  | -  | -  | -   | -  | 57.81 | 89°     | -   |
| BS50                 | +             | + | +  | 60    | 61.5  | -    | -  | + | + | +  | -  | -  | +   | +  | 59.5  | 89.5°   | -   |
| BS60                 | +             | + | -  | 53.3  | 78.3  | +    | ++ | - | - | -  | -  | -  | -   | -  | 60.45 | 101°    | +   |
| BS62                 | +             | + | -  | 51.7  | 33.3  | ++++ | -  | + | + | +  | -  | +  | -   | -  | 65.5  | 90.5°   | +   |
| BS65                 | +             | + | -  | 63.6  | 78.5  | +    | -  | + | + | -  | +  | -  | +   | +  | 67.63 | 92°     | +   |
| BS66                 | +             | + | -  | 60    | 66.6  | -    | ++ | + | + | +  | -  | -  | -   | -  | 70.06 | 91.7°   | -   |
| BS67                 | +             | + | +  | 60    | 66.67 | +    | -  | + | + | ++ | -  | -  | -   | -  | 70.05 | 107°    | -   |
| BS68                 | +             | + | +  | 11.1  | 53.3  | +    | -  | + | + | +  | -  | -  | ++  | -  | 70.5  | 105°    | -   |
| BS69                 | +             | + | +  | 72.4  | 45.4  | +++  | -  | + | + | +  | -  | -  | -   | +  | 68.55 | 101°    | -   |
| BS70                 | +             | + | +  | 46.6  | 64.2  | +    | -  | + | + | ++ | -  | -  | -   | -  | 49.88 | 92°     | -   |
| BS71                 | +             | + | -  | 60    | 61.5  | -    | -  | + | + | +  | -  | -  | +++ | +  | 47.17 | 96° 98° | -   |
| BS72                 | +             | + | +  | 53.3  | 78.3  | +    | +  | - | - | -  | -  | -  | -   | -  | 46.05 | 101°    | -   |
| BS73                 | +             | + | -  | 51.7  | 33.3  | -    | -  | + | + | +  | -  | +  | +   | -  | 68.5  | 103°    | -   |
| BS74                 | +             | + | -  | 63.6  | 78.5  | +++  | -  | + | + | +  | -  | -  | -   | +  | 69.03 | 104°    | -   |
| BS75                 | +             | + | -  | 60    | 66.6  | +    | -  | + | + | +  | -  | -  | -   | -  | 71.5  | 86.4°   | -   |
| BS76                 | +             | + | +  | 60    | 64.2  | -    | -  | + | + | -  | -  | -  | +++ | -  | 70.04 |         | +   |

**Key:** 1, tilted glass slide test; 2, Parafilm M test; 3, drop collapse test; 4, EI<sub>24</sub> assay, K: kerosene and D: diesel; 5, oil spreading assay; 6, CTAB-MB assay; 7, droplet assay; 8, penetration assay; 9, microplate assay; 10, replica plate method; 11, HOA assay; 12, blood agar hemolysis, and 13, BATH assay; 14, surface tension; 15, water contact angle measurement; 16, atomized oil assay.

For blood agar hemolysis: ‘-’, no hemolysis; ‘+’, hemolysis with a clear zone of 1-1.5 cm; ‘++’, complete hemolysis with a diameter of lysis 1.6-2.5 cm; ‘+++’, complete hemolysis with a diameter of lysis 2.6-4 cm. For the oil spreading technique: ‘+’ average halo diameter between 0.5 and 0.9 cm, ‘++’ average halo diameter between 1 and 1.5 cm, ‘+++’ average halo diameter >1.5 and < 3 cm, and ‘++++’ average halo diameter >3. 1 and < 5 cm. For atomized oil assay: ‘-’, no halo; ‘+’ average halo radius between 1 and 2 mm, ‘++’ average halo radius between 2 and 4 mm, and ‘+++’ average halo radius > 4 and < 9 mm. For other assays: ‘-’ negative and ‘+’ positive reaction.

**Table S3.** Comparative analysis of methods for detection of biosurfactant production (n= 76)

| Sr. no. | Method                | Positive by method |                                            |                   | Negative by method |                                                            | Method number |
|---------|-----------------------|--------------------|--------------------------------------------|-------------------|--------------------|------------------------------------------------------------|---------------|
|         |                       | No. of positives   | No. (%) of strains with identical response | Response level    | No. of negatives   | No. (%) of negatives that were positive with other methods |               |
| 1.      | Blood agar haemolysis | 41                 | 13 (31%)                                   | +++ <sup>a</sup>  | 35                 | 23 (66%)                                                   | 2 and 3       |
|         |                       |                    | 06 (07%)                                   | ++                |                    | 12 (34%)                                                   |               |
|         |                       |                    | 22 (53%)                                   | +                 |                    |                                                            |               |
| 2.      | Drop collapse         | 54                 | 09 (17%)                                   | ++                | 22                 | 14 (63%)                                                   | 3             |
|         |                       |                    | 45 (83%)                                   | +                 |                    | 08 (36%)                                                   | 4 and 5       |
| 3.      | Oil spreading         | 51                 | 08 (16%)                                   | ++++ <sup>b</sup> | 25                 | 09 (36%)                                                   | 4             |
|         |                       |                    | 07 (14%)                                   | +++               |                    | 16 (64%)                                                   | 1             |
|         |                       |                    | 12 (24%)                                   | ++                |                    |                                                            |               |
| 4.      | CTAB-MB               | 16                 | 06 (37%)                                   | ++                | 60                 | 36 (60%)                                                   | 3 and 5       |
|         |                       |                    | 10 (62%)                                   | +                 |                    | 24 (40%)                                                   | 2             |
| 5.      | Microplate            | 48                 | 09 (19%)                                   | ++                | 28                 | 17 (60%)                                                   | 1             |
|         |                       |                    | 39 (82%)                                   | +                 |                    | 11 (39%)                                                   | 4             |

<sup>a</sup> Hemolysis assay: +, incomplete hemolysis; ++, complete hemolysis with a diameter of lysis < 1 cm; +++, complete hemolysis with a diameter of lysis < 1 cm but < 3 cm and +++++, complete hemolysis with a diameter of lysis > 3 cm and green colonies. <sup>b</sup> Oil spreading assay: +, diameter of clearing zone between 0.5 and 0.9 cm; ++, diameter of clearing zone between 1 and 1.5 cm; +++, diameter of clearing zone between > 1.5 and < 2.1 cm and +++++, diameter of clearing zone > 2.1 and < 3 cm. n, number of isolates tested.

**Table S4.** Statistical correlations between different methods

|               | <b>Spearman rank correlation coefficient (<math>r_s</math>)</b> |                      |                      |                |                   | <b>Test of independence correlation coefficient (<math>\rho</math>)</b> |                      |                      |                |                   |
|---------------|-----------------------------------------------------------------|----------------------|----------------------|----------------|-------------------|-------------------------------------------------------------------------|----------------------|----------------------|----------------|-------------------|
|               | <b>Blood agar</b>                                               | <b>Drop collapse</b> | <b>Oil spreading</b> | <b>CTAB-MB</b> | <b>Microplate</b> | <b>Blood agar</b>                                                       | <b>Drop collapse</b> | <b>Oil spreading</b> | <b>CTAB-MB</b> | <b>Microplate</b> |
| Blood agar    | 1                                                               | 0.541                | 0.453                | 0.258          | 0.316             | 1                                                                       | 0.286                | 0.213                | 0.202          | 0.185             |
| Drop collapse |                                                                 | 1                    | 0.91                 | 0.335          | 0.284             |                                                                         | 1                    | 0.82                 | 0.157          | 0.193             |
| Oil spreading |                                                                 |                      | 1                    | 0.569          | 0.455             |                                                                         |                      | 1                    | 0.271          | 0.254             |
| CTAB-MB       |                                                                 |                      |                      | 1              | 0.358             |                                                                         |                      |                      | 1              | 0.22              |
| Microplate    |                                                                 |                      |                      |                | 1                 |                                                                         |                      |                      |                | 1                 |

**Table S5.** Biochemical and physiological properties of the isolate BS02

| <b>Characteristics</b>                                                     | <b>BS02</b>                |
|----------------------------------------------------------------------------|----------------------------|
| <i>Morphology on BSM agar amended with diesel/crude glycerol (2%, v/v)</i> |                            |
| <b>Gram Stain</b>                                                          | +                          |
| <b>Colony shape</b>                                                        | circular                   |
| <b>Colony size (mm)</b>                                                    | 0.7-1.0                    |
| <b>Cell shape/morphology</b>                                               | rod                        |
| <b>Cell size (µm) (length × width)</b>                                     | 0.8-1.0×2.0-2.5            |
| <b>Elevation</b>                                                           | slightly raised/low convex |
| <b>Edge/Margin</b>                                                         | rhizoid                    |
| <b>Surface</b>                                                             | shiny and smooth           |
| <b>Opacity</b>                                                             | translucent                |
| <b>Motility</b>                                                            | motile                     |
| <b>Spore formation</b>                                                     | +                          |
| <i>Pigmentation on:</i>                                                    |                            |
| <b>NB</b>                                                                  | -                          |
| <b>LB</b>                                                                  | -                          |
| <b>BSM (+diesel/glycerol)</b>                                              | -                          |
| <b>Physiological tests</b>                                                 |                            |
| <b>Growth at temperature (°C)</b>                                          |                            |
| <b>04</b>                                                                  | -                          |
| <b>41</b>                                                                  | +                          |
| <b>Optimum growth temperature (°C)</b>                                     | 30                         |
| <b>pH range for growth</b>                                                 | 6.5-10.0                   |
| <b>pH optima</b>                                                           | 7.0-8.0                    |
| <b>NaCl range for growth (% w/v)</b>                                       | 1-10                       |
| <b>IMViC</b>                                                               |                            |
| <b>Indole production</b>                                                   | -                          |
| <b>Methyl red test</b>                                                     | -                          |
| <b>Voges Proskauer test</b>                                                | -                          |
| <b>Citrate utilization</b>                                                 | -                          |
| <b>Reduction of nitrate to nitrite</b>                                     | +                          |
| <b>H<sub>2</sub>S production</b>                                           | -                          |
| <b>Utilization of:</b>                                                     |                            |
| <b>D-Glucose</b>                                                           | +/w                        |
| <b>D-Maltose</b>                                                           | +                          |
| <b>D-Mannitol</b>                                                          | w                          |
| <b>L-Rhamnose</b>                                                          | -                          |
| <b>Sucrose</b>                                                             | +                          |
| <b>Fructose</b>                                                            | +                          |
| <b>Trehalose</b>                                                           | -                          |
| <b>Xylose</b>                                                              | +                          |
| <b>Enzyme profile</b>                                                      |                            |
| <b>α-Amylase</b>                                                           | -/w                        |
| <b>Arginine dihydrolase</b>                                                | w                          |
| <b>Catalase</b>                                                            | +                          |

| <b>Characteristics</b> | <b>BS02</b> |
|------------------------|-------------|
| <b>Gelatinase</b>      | +           |
| <b>Oxidase</b>         | +           |
| <b>Urease</b>          | -           |
| <i>Hydrolysis of:</i>  |             |
| <b>Tween 20</b>        | -           |
| <b>Tween 80</b>        | -           |
| <b>Starch</b>          | w           |
| <b>Casein</b>          | +           |
| <b>Gelatin</b>         | +           |

+, positive/growth; -, negative/no growth; w, weak growth



**Table S6.** Relative abundance and profiling of cellular fatty acids of the isolate BS02

| Fatty acid <sup>a</sup>                              | Profile (%) | Fatty acid <sup>a</sup>                                      | Profile (%)       |
|------------------------------------------------------|-------------|--------------------------------------------------------------|-------------------|
| <b>C<sub>9:0</sub></b>                               | -           | <b>anteiso-C<sub>17:0</sub></b>                              | 5.8               |
| <b>C<sub>10:0</sub></b>                              | -           | <b>C<sub>16:0</sub> 3OH</b>                                  | -                 |
| <b>C<sub>10:0</sub> 3OH</b>                          | -           | <b>C<sub>16:1</sub> <math>\omega</math>5<i>c</i></b>         | -                 |
| <b>C<sub>11:0</sub></b>                              | -           | <b>C<sub>16:1</sub> <math>\omega</math>7<i>c</i></b>         | -                 |
| <b>iso-C<sub>11:0</sub> 3OH</b>                      | -           | <b>C<sub>16:1</sub> <math>\omega</math>9<i>c</i></b>         | -                 |
| <b>C<sub>11:0</sub> 3OH</b>                          | -           | <b>C<sub>16:1</sub> <math>\omega</math>11<i>c</i></b>        | 3.7               |
| <b>C<sub>12:0</sub></b>                              | -           | <b>C<sub>16:1</sub> <math>\omega</math>7<i>c</i> alcohol</b> | 4.4               |
| <b>C<sub>12:0</sub> 2OH</b>                          | -           | <b>iso-C<sub>17:0</sub></b>                                  | 9.5               |
| <b>C<sub>12:0</sub> 3OH</b>                          | -           | <b>iso-C<sub>17:0</sub> 3OH</b>                              | 2.2               |
| <b>C<sub>13:0</sub></b>                              | -           | <b>iso-C<sub>17:1</sub> <math>\omega</math>10<i>c</i></b>    | 1.8               |
| <b>iso-C<sub>13:0</sub></b>                          | -           | <b>C<sub>17:0</sub> cyclo</b>                                | -                 |
| <b>C<sub>14:0</sub></b>                              | -           | <b>C<sub>17:0</sub></b>                                      | 1.0               |
| <b>iso-C<sub>14:0</sub></b>                          | 3.4         | <b>C<sub>17:1</sub> <math>\omega</math>8<i>c</i></b>         | -                 |
| <b>C<sub>14:1</sub> <math>\omega</math>7<i>c</i></b> | 0.7         | <b>C<sub>18:0</sub></b>                                      | 1.3               |
| <b>C<sub>14:1</sub> <math>\omega</math>5<i>c</i></b> | -           | <b>C<sub>18:1</sub> <i>cis</i> 11</b>                        | 0.5               |
| <b>C<sub>15:0</sub></b>                              | -           | <b>C<sub>18:1</sub> <math>\omega</math>9<i>c</i></b>         | 1.5               |
| <b>iso-C<sub>15:0</sub></b>                          | 38.5        | <b>C<sub>18:1</sub> <math>\omega</math>7<i>c</i></b>         | 1.0               |
| <b>anteiso-C<sub>15:0</sub></b>                      | 28.4        | <b>C<sub>19:0</sub> cyclo</b>                                | -                 |
| <b>C<sub>15:1</sub> <math>\omega</math>8<i>c</i></b> | -           | <b>C<sub>19:0</sub> cyclo <math>\omega</math>8<i>c</i></b>   | -                 |
| <b>C<sub>15:1</sub> <math>\omega</math>6<i>c</i></b> | -           | <b>Summed Feature*</b>                                       |                   |
| <b>C<sub>16:1</sub> <i>trans</i> 9</b>               | -           | <b>1</b>                                                     | -                 |
| <b>C<sub>16:1</sub> <i>cis</i> 9</b>                 | -           | <b>3</b>                                                     | 1.6 <sup>b</sup>  |
| <b>C<sub>16:0</sub></b>                              | -           | <b>5</b>                                                     | -                 |
| <b>iso-C<sub>16:0</sub></b>                          | 3.5         | <b>8</b>                                                     | 12.4 <sup>c</sup> |

<sup>a</sup> $\omega$ , Methyl end of fatty acid, *c*, cis configuration of the double bond, cyclo, cyclopropane fatty acid, iso, branched fatty acids, OH indicates the position of hydroxyl group from the acid end. Fatty acids representing less than 0.1% in all strains were omitted. Summed features represent two or three fatty acids that cannot be separated by GLC using the MIDI system.\*Summed features represent two or three fatty acids that cannot be separated by GLC using the MIDI system <sup>b</sup>C<sub>16:1</sub>  $\omega$ 6*c* /C<sub>16:1</sub>  $\omega$ 7*c*, <sup>c</sup>C<sub>18:1</sub>  $\omega$ 7*c*/C<sub>18:1</sub>  $\omega$ 6*c*.

**Table S7.** Effect of various concentration of sunflower soapstock on growth, surface tension, emulsification activity and biosurfactant production by *B. clausii* BS02.

| Soapstock (% w/v) | ST (mN m <sup>-1</sup> ) <sup>a</sup> | EI <sub>24</sub> % <sup>a</sup> | Biomass (g l <sup>-1</sup> ) <sup>a</sup> | Biosurfactant (g l <sup>-1</sup> ) <sup>a</sup> |
|-------------------|---------------------------------------|---------------------------------|-------------------------------------------|-------------------------------------------------|
| 0.5               | 31.7±0.4                              | 72±0.3                          | 1.2±0.2                                   | 1.2±0.01                                        |
| 1                 | 31.2±0.2                              | 76±0.4                          | 1.3±0.1                                   | 1.5±0.04                                        |
| 2                 | 30.5±0.3                              | 78±0.1                          | 1.4±0.1                                   | 1.7±0.02                                        |
| 3                 | 30                                    | 82±0.4                          | 1.6±0.2                                   | 2.6±0.03                                        |
| 4                 | 30.5±0.1                              | 77±0.3                          | 1.5±0.3                                   | 2.2±0.04                                        |
| 5                 | 30.5±0.3                              | 75±0.1                          | 1.4±0.2                                   | 2.0±0.1                                         |

<sup>a</sup> The data are mean ± standard deviation of three independent experiments.

**Table S8:** Literature reports on the production of lipopeptide biosurfactants using various economical substrates.

| Strain                                   | Carbon source (g l <sup>-1</sup> )                             | Biosurfactant (g l <sup>-1</sup> )    | Reference(s) |
|------------------------------------------|----------------------------------------------------------------|---------------------------------------|--------------|
| <i>Bacillus subtilis</i> C9              | Glucose (40)                                                   | 13.5                                  | 11           |
| <i>B. subtilis</i> ATCC 21332            | Mineral salt+glucose (40)                                      | 3.5                                   | 12           |
| <i>B. subtilis</i> LB5a                  | Cassava wastewater                                             | 3.0                                   | 13           |
| <i>B. subtilis</i> #573                  | Mineral salt+sucrose                                           | 2.15                                  | 14           |
| <i>B. subtilis</i> PT2                   | Nutrient broth+plam oil (20-80)                                | -                                     | 15           |
| <i>Bacillus</i> I-15                     | Glucose (10 mM)                                                | 0.2                                   | 16           |
| <i>B. subtilis</i> EG1                   | Luria-Bertani medium                                           | 0.15                                  | 17           |
| <i>Sphingobacterium detergens</i>        | MCA medium+glucose+n-alkane                                    | 0.46                                  | 18           |
| <i>B. pumilis</i> KS3                    | Mineral medium+glucose (20)                                    | 2.37                                  | 19           |
| <i>B. methyloptrophicus</i> USTBa        | MSM medium+crude oil (20)                                      | 1.8                                   | 20           |
| <i>B. subtilis</i> LSFM-05               | BSM+biodiesel glycerol (50)                                    | 1.37                                  | 21           |
| <i>B. circulans</i>                      | Glycerol mineral salts medium                                  | 2.9                                   | 22           |
| <i>B. circulans</i>                      | Starch mineral salts medium                                    | 2.5                                   | 22           |
| <i>B. subtilis</i> SPB1                  | Tuna fish flour (4.34 g)+potatowaste flour (5.66 g)            | 27.1 mg g <sup>-1</sup>               | 23           |
| <i>Bacillus</i>                          | Basal medium containing goat tallow                            | 2.03 g g <sup>-1</sup> of goat tallow | 24           |
| <i>B. subtilis</i> DM-03                 | M9 media and 2.0% (w/v) potato peel                            | 80.0 mg gds <sup>-1</sup>             | 25           |
| <i>B. amyloliquefaciens</i> XZ-173       | Soybean flour+rice straw+maltose (20 w/w)+ glycerol (26.5 w/w) | 15.03 mg gds <sup>-1</sup>            | 26           |
| <i>B. subtilis</i> strains CCTCC M201162 | Beer wastewater (40)                                           | 1.26                                  | 27           |
| <i>B. circulans</i>                      | Glucose mineral salts (20)                                     | 1.0                                   | 28           |
| <i>B. licheniformis</i> TKU004           | Squid pen powder (10)                                          | 0.55                                  | 29           |
| <i>B. subtilis</i> ATCC 21332            | Landy medium                                                   | 0.2                                   | 30           |
| <i>B. subtilis</i> ATCC 21332            | Landy medium                                                   | 0.2-0.8                               | 31           |
| <i>B. subtilis</i> B20                   | Date molasses (80)                                             | 2.29                                  | 32           |

|                                |                                                                 |      |            |
|--------------------------------|-----------------------------------------------------------------|------|------------|
| <i>B. licheniformis</i>        | Bushnell-Haas medium                                            | 10.0 | 33         |
| <i>B. pumilus</i> UFPEDA 448   | Okara (500)+sugarcane bagasse (500)                             | 0.80 | 34         |
| <i>B. subtilis</i> LAMI005     | Clarified cashew apple juice (total reducing sugar content: 20) | 0.35 | 35         |
| <i>B. subtilis</i> LAMI005     | Glycerol (20)                                                   | 0.44 | 36         |
| <i>B. clausii</i> isolate BS02 | BSM medium + sunflower soapstock (30)                           | 2.5  | This study |

**Table S9:** Physicochemical and biochemical properties of the crude biosurfactant of *B. clausii* BS02 cultivated on BSM medium supplied with sunflower soapstock (3%, w/v).

| Properties                                                                   | Values                 |
|------------------------------------------------------------------------------|------------------------|
| Physical appearance                                                          | White semisolid        |
| Biochemical analysis (% composition)                                         |                        |
| (a) Protein                                                                  | 67.3±2.5               |
| (b) Lipid                                                                    | 28.0±2.1               |
| (c) Carbohydrate                                                             | 4.5±2.8                |
| Surface tension reduction (mN m <sup>-1</sup> )                              | 30.0±0.4               |
| Interfacial tension against n-hexadecane (mN m <sup>-1</sup> )               | 1.5±0.2                |
| CMC <sup>a</sup> (mg l <sup>-1</sup> )                                       | 45±0.4                 |
| Emulsification activity (A <sub>600 nm</sub> ) against                       |                        |
| (a) Benzene                                                                  | 0.636                  |
| (b) Kerosene                                                                 | 0.885                  |
| (c) Paraffin                                                                 | 0.753                  |
| (d) n-hexadecane                                                             | 0.857                  |
| Percent activity remains after heating the crude biosurfactants <sup>b</sup> |                        |
| (a) Surface tension reduction                                                | 94.0±0.5               |
| (b) CMC                                                                      | 100.0                  |
| SR <sup>c</sup> for oil                                                      | 23.55×10 <sup>-2</sup> |
| SR for fat                                                                   | 76.18×10 <sup>-2</sup> |
| Foam height <sup>d</sup>                                                     | 77%                    |

Results are mean±S.D. of three independent experiments; <sup>a</sup>CMC, critical micelle concentration; <sup>b</sup>At 100°C for 60 min; <sup>c</sup>SR, solubilization ratio; <sup>d</sup>Calculated after vigorous shaking of the crude biosurfactant solution for 2 min using the equation: foaming = height of foam/total height × 100.

**Table S10:** Dose-dependent mortalities of adzuki bean weevil, *C. chinensis* (L.) and mealybug, *M. hirsutus* after treatment with crude biosurfactant of *B. clausii* BS02 by vapor toxicity bioassay.

| Treatment dose ( $\mu\text{g ml}^{-1}$ ) | Mortality (%)*                |                                |                                |                                |
|------------------------------------------|-------------------------------|--------------------------------|--------------------------------|--------------------------------|
|                                          | 12 h                          | 24 h                           | 36 h                           | 48 h                           |
| <b><i>Callosobruchus chinensis</i></b>   |                               |                                |                                |                                |
| Control                                  | 2.76 $\pm$ 1.52 <sup>a</sup>  | 2.85 $\pm$ 1.55 <sup>a</sup>   | 3.68 $\pm$ 1.51 <sup>a</sup>   | 4.17 $\pm$ 1.55 <sup>a</sup>   |
| 0.1                                      | 8.77 $\pm$ 5.37 <sup>ab</sup> | 9.75 $\pm$ 4.31 <sup>ab</sup>  | 20.71 $\pm$ 4.39 <sup>ab</sup> | 27.33 $\pm$ 4.33 <sup>ab</sup> |
| 0.5                                      | 6.85 $\pm$ 1.64 <sup>a</sup>  | 8.89 $\pm$ 2.61 <sup>a</sup>   | 22.18 $\pm$ 2.66 <sup>a</sup>  | 34.81 $\pm$ 2.58 <sup>a</sup>  |
| 1.0                                      | 3.81 $\pm$ 1.41 <sup>ab</sup> | 7.84 $\pm$ 1.55 <sup>ab</sup>  | 17.88 $\pm$ 1.35 <sup>ab</sup> | 35.74 $\pm$ 1.22 <sup>ab</sup> |
| 5.0                                      | 6.73 $\pm$ 4.33 <sup>ab</sup> | 11.75 $\pm$ 4.39 <sup>ab</sup> | 23.63 $\pm$ 4.37 <sup>ab</sup> | 44.77 $\pm$ 3.35 <sup>ab</sup> |
| 10.0                                     | 14.12 $\pm$ 5.57 <sup>b</sup> | 19.48 $\pm$ 5.31 <sup>b</sup>  | 29.44 $\pm$ 5.39 <sup>b</sup>  | 45.71 $\pm$ 5.51 <sup>b</sup>  |
| 20.0                                     | 26.35 $\pm$ 6.28 <sup>c</sup> | 34.37 $\pm$ 6.28 <sup>c</sup>  | 38.31 $\pm$ 5.22 <sup>c</sup>  | 47.33 $\pm$ 7.69 <sup>b</sup>  |
| 30.0                                     | 33.74 $\pm$ 8.25 <sup>c</sup> | 39.72 $\pm$ 8.28 <sup>c</sup>  | 44.78 $\pm$ 7.21 <sup>c</sup>  | 48.75 $\pm$ 5.18 <sup>b</sup>  |
| 40.0                                     | 40.55 $\pm$ 5.58 <sup>c</sup> | 46.64 $\pm$ 5.59 <sup>d</sup>  | 48.62 $\pm$ 6.55 <sup>c</sup>  | 49.62 $\pm$ 8.19 <sup>b</sup>  |
| 50.0                                     | 56.15 $\pm$ 8.23 <sup>d</sup> | 58.13 $\pm$ 8.51 <sup>d</sup>  | 59.11 $\pm$ 5.52 <sup>d</sup>  | 60.11 $\pm$ 6.21 <sup>c</sup>  |
| 100.0                                    | 99.64 $\pm$ 3.88 <sup>e</sup> | 99.55 $\pm$ 2.84 <sup>e</sup>  | 100.0 $\pm$ 0 <sup>e</sup>     | 100.0 $\pm$ 0 <sup>e</sup>     |
| <b><i>Maconellicoccus hirsutus</i></b>   |                               |                                |                                |                                |
| Control                                  | 1.75 $\pm$ 1.22 <sup>a</sup>  | 2.88 $\pm$ 1.51 <sup>a</sup>   | 3.77 $\pm$ 1.55 <sup>a</sup>   | 4.55 $\pm$ 1.51 <sup>a</sup>   |
| 0.1                                      | 8.71 $\pm$ 4.56 <sup>ab</sup> | 9.33 $\pm$ 4.38 <sup>ab</sup>  | 22.70 $\pm$ 4.39 <sup>ab</sup> | 26.31 $\pm$ 4.35 <sup>ab</sup> |
| 0.5                                      | 8.82 $\pm$ 1.66 <sup>a</sup>  | 8.83 $\pm$ 2.36 <sup>a</sup>   | 24.11 $\pm$ 2.66 <sup>a</sup>  | 38.86 $\pm$ 2.43 <sup>a</sup>  |
| 1.0                                      | 5.16 $\pm$ 1.85 <sup>ab</sup> | 7.55 $\pm$ 1.51 <sup>ab</sup>  | 16.48 $\pm$ 1.32 <sup>ab</sup> | 31.75 $\pm$ 1.73 <sup>ab</sup> |
| 5.0                                      | 7.78 $\pm$ 5.31 <sup>ab</sup> | 12.74 $\pm$ 6.38 <sup>ab</sup> | 24.11 $\pm$ 5.33 <sup>ab</sup> | 45.43 $\pm$ 3.32 <sup>ab</sup> |
| 10.0                                     | 15.19 $\pm$ 5.55 <sup>b</sup> | 18.43 $\pm$ 4.30 <sup>b</sup>  | 30.52 $\pm$ 5.58 <sup>b</sup>  | 41.70 $\pm$ 6.53 <sup>b</sup>  |
| 20.0                                     | 25.11 $\pm$ 7.33 <sup>c</sup> | 36.32 $\pm$ 8.22 <sup>c</sup>  | 39.34 $\pm$ 5.82 <sup>c</sup>  | 46.44 $\pm$ 3.88 <sup>b</sup>  |
| 30.0                                     | 30.77 $\pm$ 8.21 <sup>c</sup> | 38.55 $\pm$ 6.29 <sup>c</sup>  | 45.75 $\pm$ 5.25 <sup>c</sup>  | 47.18 $\pm$ 3.92 <sup>b</sup>  |
| 40.0                                     | 42.48 $\pm$ 6.11 <sup>c</sup> | 45.65 $\pm$ 4.66 <sup>d</sup>  | 47.19 $\pm$ 6.87 <sup>c</sup>  | 48.61 $\pm$ 5.11 <sup>b</sup>  |
| 50.0                                     | 55.18 $\pm$ 7.22 <sup>d</sup> | 59.11 $\pm$ 6.55 <sup>d</sup>  | 59.68 $\pm$ 4.52 <sup>d</sup>  | 61.55 $\pm$ 4.22 <sup>c</sup>  |
| 100.0                                    | 95.11 $\pm$ 2.81 <sup>e</sup> | 97.59 $\pm$ 2.88 <sup>e</sup>  | 100.0 $\pm$ 0 <sup>e</sup>     | 100.0 $\pm$ 0 <sup>e</sup>     |

\*Means  $\pm$  SD of triplicate. The data with the same letter in the same column are not significantly different ( $p < 0.05$ , Tukey's test). Methanol was used as a solvent control.

## References

- 1 W. Ismail, I.S. Al-Rowaihi, A.A. Al-Humam, R.Y. Hamza, A.M. El Nayal, M. Bououdina, *Int. Biodet. Biodegrad.* 2013, **84**, 168-178.
- 2 P.G. De Gennes, Wetting: statics and dynamics. *Reviews of Modern Physics* 1985, **57**, 827-863.
- 3 P. Gerhardt, R.G.E Murray, W.A. Wood, N.R. Krieg (Eds.), *Methods for General and Molecular Bacteriology*, Ed. 2, ASM Press, Washington, DC, 1994.
- 4 M. Suzuki, Y. Nakagawa, S. Harayama, S. Yamamoto, *Int. J. Sys. Evol. Microbiol.* 2001, **51**, 1639-1652.
- 5 J.G. Holt, N.R. Krieg, P.H.A. Sneath, J.T. Staley, S.T. Williams, *Bergey's Manual of Determinative Bacteriology*, Ed. 9, Williams & Wilkins, Baltimore, New York, 1994.
- 6 F.M. Ausubel, R. Brent, R.E. Kingston, D.D. Moore, J.G. Seidman, J.A. Smith, K. Struhls, *Current protocols in Molecular Biology*, Wiley, New York, 2003.
- 7 S.F. Altschul, T.L. Madden, A.A. Schäffer, J. Zhang, Z. Zhang, W. Miller, D.J. Lipman, *Nucleic Acids Res.* 1997, **25**, 3389-3402
- 8 N. Saitou, M. Nei, *Mol. Biol. Evol.* 1987, **4**, 406-425.
- 9 M. Kimura, *J. Mol. Evol.* 1980, **16**, 111-120.
- 10 K. Tamura, D. Peterson, N. Peterson, G. Stecher, M. Nei, S. Kumar, *Mol. Biol. Evol.* 2011, **28**, 2731-2739.
- 11 Y. Wei, L. Wang, J.-S. Chang, S.-S. Kung, *J. Biosci. Bioeng.* 2003, **96(2)**, 174-178.
- 12 Y.-H. Wei, I.-M. Chu, *Enzym. Microb. Technol.* 1998, **22**, 724-728.
- 13 M. Nitschke, G.M. Pastore, *Biores. Technol.* 2006, **97**, 336-341.
- 14 J.F.B. Pereira, E.J. Gudiña, R. Costa, R. Vitorino, J.A. Teixeira, J.A.P. Coutinho, L.R. Rodrigues, *Fuel* 2013, **111**, 259-268.

- 15 O. Pornsunthorntawe, N. Arttaweeporn, S. Paisanjit, P. Somboonthanate, M. Abe, R. Rujiravanita, S. Chavadej, *Biochem. Eng. J.* 2008, **42**, 172-179.
- 16 W. Ismail, I.S. Al-Rowaihi, A.A. Al-Humam, R.Y. Hamza, A.M. El Nayal, M. Bououdina, *Int. Biodet. Biodegrad.* 2013, **84**, 168-178.
- 17 D.A. Vaz, E.J. Gudiña, E.J. Alameda, J.A. Teixeira, L.R. Rodrigues, *Colloids Surf. B* 2012, **89**, 167-174.
- 18 C. Burgos-Díaz, R. Pons, J.A. Teruel, F.J. Aranda, A. Ortiz, A. Manresa, A.M. Marqués, *J. Colloid Interface Sci.* 2013, **394**, 368-379.
- 19 K. Patowary, R. R. Saikia, M. C. Kalita, S. Deka, *Ann. Microbiol.* 2014, doi:10.1007/s13213-014-0854-7.
- 20 R. Chandankere, J. Yao, M.M.F. Choi, K. Masakoral, Y. Chan, *Biochem. Eng. J.* 2013, **74** 46-53.
- 21 A.F. de Faria, D.S. Teodoro-Martinez, G.N. de Oliveira Barbosa, B.G. Vaz, I.S.Silva, J.S. Garcia, M.R. Totolac, *et al. Process Biochem.* 2011, **46**, 1951-1957.
- 22 P. Das, S. Mukherjee, R. Sen, *Biores. Technol.* 2009, **100**, 1015-1019.
- 23 I. Mnif, M. Elleuch, S.E. Chaabouni, D. Ghribi, *Crop Prot.* 2013, **50**, 66-72.
- 24 K. Ramani, S. Chandan Jain, A.B. Mandal, G. Sekaran, *Colloids Surf. B* 2012, **97**, 254- 263.
- 25 K. Das, A.K. Mukherjee, *Process Biochem.* 2007, **42**, 1191-1199.
- 26 Z. Zhu, F. Zhang, Z. Wei, W. Ran, Q. Shen, *J. Environ. Manage.* 2013, **127**, 96-102.
- 27 J.H. Liu, Y.T. Chen, H. Li, Y.P. Jia, R.D. Xu, J. Wang, *Environ. Prog. Sustain. Energy* 2014, doi:10.1002/ep.
- 28 S. Mukherjee, P. Das, C. Sivapathasekaran, R. Sen, *Lett. Appl. Microbiol.* 2009, **48**, 281-288.



- 29 Y.-C. Chen, T.-J. Chiang, T.-W. Liang, I.-L. Wang, S.-L. Wang, *Biocatal. Agri. Biotechnol.* 2012, **1**, 162-169.
- 30 F. Coutte, D. Lecouturier, V. Leclère, M. Béchet, P. Jacques, P. Dhulster, *Process Biochem.* 2013, **48**, 25-32.
- 31 O. Chtioui, K. Dimitrov, F. Gancel, P. Dhulster, I. Nikov, *Process Biochem.* 2012, **47**, 2020-2024.
- 32 S.N. Al-Bahry, Y.M. Al-Wahaibi, A.E. Elshafie, A.S. Al-Bemani, S.J. Joshi, H.S. Al-Makhmari, H.S. Al-Sulaimani, *Int. Biodet. Biodegrad.* 2013, **81**, 141-146.
- 33 M.L. Ibrahim, U.J.J. Ijah, S.B. Manga, L.S. Bilbis, S. Umar, *Int. Biodet. Biodegrad.* 2013, **81**, 28-34.
- 34 C.T. Slivinski, E. Mallmann, J. Magali de Araújo, D.A. Mitchell, N. Krieger, *Process Biochem.* 2012, **47**, 1848-1855.
- 35 D.W.F. Oliveira, J.R. Sousa, I.W.L. Franca, A.K.N. Felix, J.J.L. Martins, L.R.B. Gonc, alves, *J. Biotechnol.* 2010, **150S**, S1-S576.
- 36 M. Sousa, V. M. M. Melo, S. Rodrigues, H. B. Sant'ana, L. R. B. Gonc, alves, *Bioprocess Biosyst. Eng.* 2012, **35**, 897-906.
